# Supplementary material for: CNT@NiO/natural rubber with excellent impedance matching and low interfacial thermal resistance toward flexible and heat-conducting microwave absorption applications
Source: Royal Society of Chemistry journal article supplement (doi:10.1039/d0tc04388e), 2020-10-23
Supplement: d0tc04388e1.pdf [file d0tc04388e1.pdf]

## Supporting Information

### **CNT@NiO/natural rubber with excellent impedance matching and low interfacial thermal resistance toward flexible and heat-conducting microwave absorption application**

Maofan Zhou,<sup>a</sup> Gengping Wan,<sup>\*a</sup> Pengpeng Mou,<sup>a</sup> Shengjie Teng,<sup>a,b</sup> Shiwei Lin<sup>b</sup> and Guizhen Wang<sup>\*a,b</sup>

<sup>a</sup> Key Laboratory of Advanced Materials of Tropical Island Resources (Hainan University), Ministry of Education, Haikou 570228, PR China.

<sup>b</sup> College of Materials Science and Engineering, Hainan University, Haikou 570228, PR China.

*E-mail addresses: wangengping001@163.com (G. Wan); wangguizhen0@hotmail.com (G. Wang)*

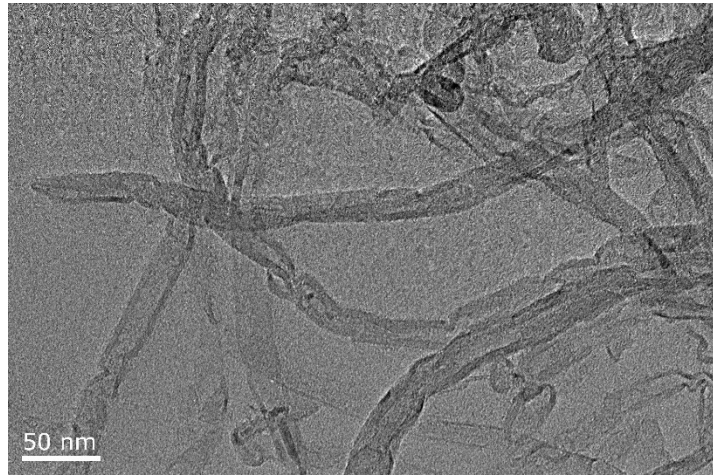

Fig. S1 TEM image of CNTs.

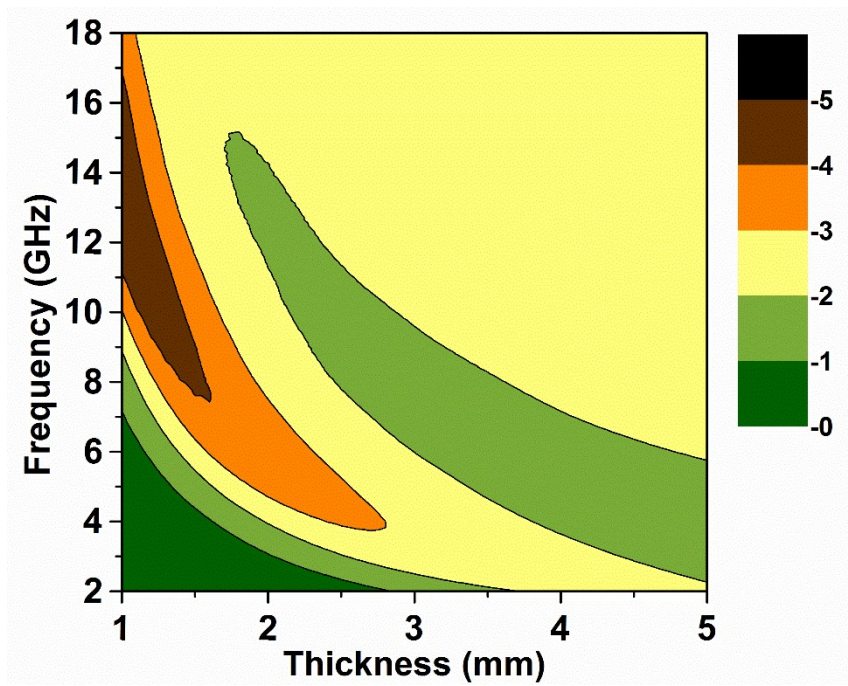

Fig. S2 Two-dimensional representations of the reflection losses for CNT.

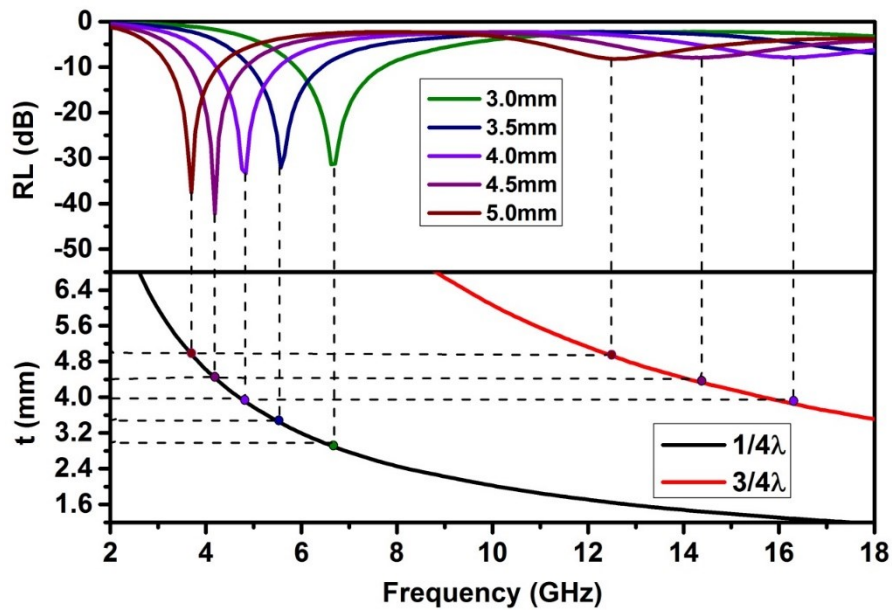

Fig. S3 comparison of various absorber thickness ( $t_m$ ) for sample CNT@100-NiO with simulated thickness under quarter and three quarter condition at the frequency of minimum RL values ( $f_m$ ).

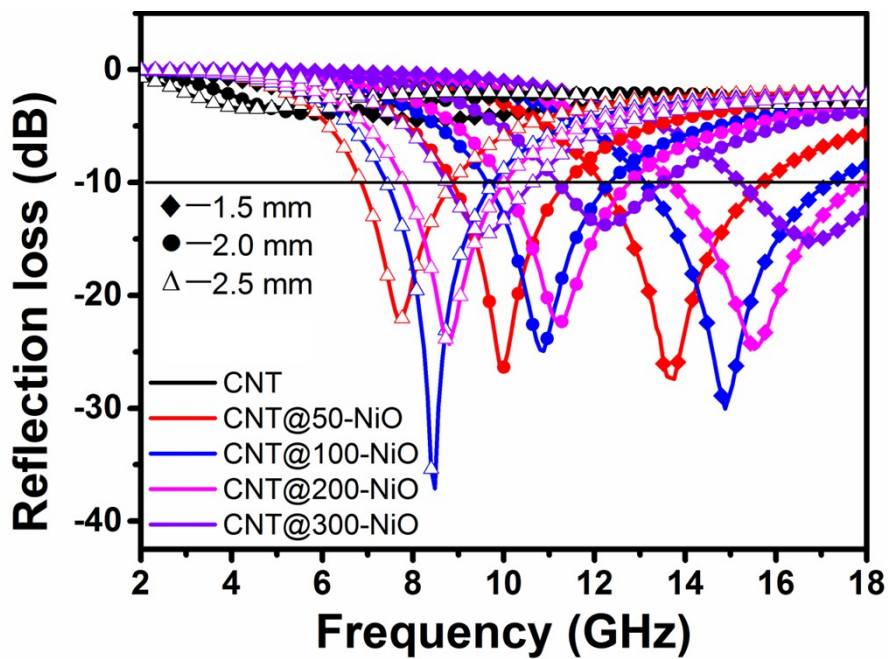

Fig. S4 Microwave RL curves of the NiO/CNT composites with the thickness of 1.5, 2.0 and 2.5 mm.

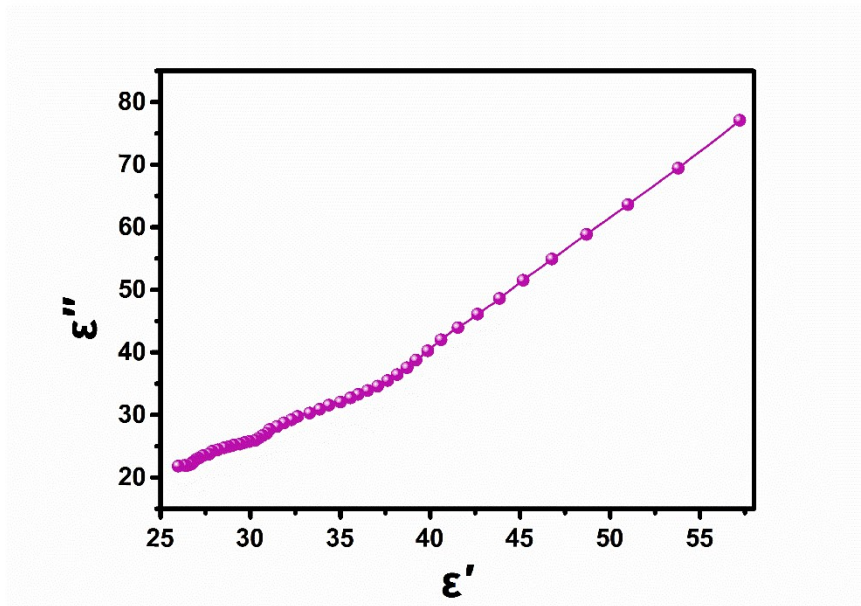

Fig. S5 Typical Cole-Cole semicircles for CNT.

**Table 1 Microwave absorption performance of absorber contain NiO**

| Absorber                                                       | Loading (%) | Thickness (mm) | RL <sub>min</sub> (dB) | EABW (GHz) | Ref          |
|----------------------------------------------------------------|-------------|----------------|------------------------|------------|--------------|
| SiC/Ni/NiO/C                                                   | 20          | 2.5            | -50.5                  | 2.96       | [S1]         |
| NiO/graphene                                                   | 25          | 1.7            | -59.6                  | 4.24       | [S2]         |
| NiO                                                            | 30          | 7.0            | -65.1                  | 3          | [S3]         |
| Graphene/Fe <sub>3</sub> O <sub>4</sub> /SiO <sub>2</sub> /NiO | 25          | 1.8            | -51.5                  | 5.1        | [S4]         |
| Microporous Ni/NiO                                             | 50          | 1.5            | -49.1                  | 5.8        | [S5]         |
| Ni/NiO/C                                                       | 10          | 2.5            | -33.9                  | 5.7        | [S6]         |
| NiO@SiO <sub>2</sub> @graphene                                 | 25          | 3.0            | -43.8                  | 5.8        | [S7]         |
| CNT@NiO                                                        | 10          | 1.3            | -43.6                  | 4.24       | Current work |

EABW: (efficient microwave absorption bandwidths (RL below -10 dB))

# References

- [S1] R. Yang, J. Yuan, C. Yu, K. Yan, Y. Fu, H. Xie, J. Chen, P.K. Chu and X. Wu, *J. Alloy. Compd.*, 2020, **816**, 152519.
- [S2] L. Wang, H. Xing, S. Gao, X. Ji and Z. Shen, *J. Mater. Chem. C*, 2017, **5**, 2005-2014.
- [S3] P. Liu, V.M.H. Ng, Z. Yao, J. Zhou, Y. Lei, Z. Yang, H. Lv and L.B. Kong, *ACS Appl. Mater. Inter.*, 2017, **9**, 16404-16416.
- [S4] L. Wang, Y. Huang, X. Sun, H. Huang, P. Liu, M. Zong and Y. Wang, *Nanoscale*, 2014, **6**, 3157-3164.
- [S5] T. Liu, Y. Pang, X. Xie, W. Qi, Y. Wu, S. Kobayashi, J. Zheng and X. Li, *J. Alloy. Compd.*, 2016, **667**, 287-296.
- [S6] Y. Shen, Y. Wei, J. Li, Y. Zhang, B. Li, X. Lu, B. Ji, P. Yan and X. Du, *Journal of Materials Science: Materials in Electronics*, 2020, **31**, 226-238.
- [S7] L. Wang, Y. Huang, X. Ding, P. Liu and M. Zong, *RSC Adv.*, 2013, **3**, 23290-23295
